# Supplementary material
Source: Springer Nature journal article supplement (https://www.springermedizin.de/resource/supplementary/12888_2010_797_MOESM1_ESM.pdf/9478792)
Supplement: MOESM1 [file 9478792]

Table 1. Sample characteristics

|                              | n           | %    |
|------------------------------|-------------|------|
| Gender                       |             |      |
| Male                         | 9           | 28.1 |
| Female                       | 23          | 71.9 |
| family relationship          |             |      |
| Fathers                      | 2           | 6.2  |
| Mothers                      | 12          | 37.5 |
| Hasbands                     | 6           | 18.7 |
| Wives                        | 8           | 25   |
| others                       | 4           | 12.5 |
| Parson living with a patient |             |      |
| Yes                          | 22          | 68.7 |
| No                           | 10          | 31.3 |
| Inpatients or outpatients    |             |      |
| Relatives of inpatients      | 14          | 43.8 |
| Relatives of outpatients     | 18          | 56.2 |
| Age (years)                  | 61.7 ± 12.5 |      |

Table 2. Differences between the baseline score and the after intervention score (paired t-test)

|         | n  | Baseline |      | Afer intervention |      | T score | P       | d   |
|---------|----|----------|------|-------------------|------|---------|---------|-----|
|         |    | M        | SD   | M                 | SD   |         |         |     |
| K6      | 32 | 8.6      | 5.4  | 3.7               | 3.3  | 5.9     | < 0.001 | 1.1 |
| J-ZBI_8 | 32 | 11.0     | 6.7  | 6.9               | 4.9  | 4.7     | < 0.001 | 0.7 |
| FAS     | 32 | 49.7     | 18.7 | 38.5              | 17.2 | 3.9     | < 0.001 | 0.6 |
| DFL     | 32 | 8.0      | 5.0  | 5.7               | 3.3  | 3.9     | < 0.001 | 0.5 |

J-ZBI\_8: The Japanese version of Zarit Burden Interview short version, FAS: Family Attitude Scale,  
DFL: Disfunction in the Ordinary Family Life Scale, d: effect size
